# Supplementary material for: Investigation of new ferrocenyl-artesunate derivatives as antiparasitics
Source: Royal Society of Chemistry journal article supplement (doi:10.1039/d3dt02254d), 2023-01-01

*Electronic Supplementary information*

**Investigation of new ferrocenyl-artesunate derivatives as antiparasitics**

Brandon L. Munnik,<sup>a</sup> Catherine H. Kaschula,<sup>a</sup> Clare R. Harding,<sup>b</sup> Prinessa Chellan<sup>a\*</sup>

<sup>a</sup> Department of Chemistry and Polymer Science, Stellenbosch University, Stellenbosch, Western Cape, South Africa

<sup>b</sup> Wellcome Centre for Integrative Parasitology, Institute of Infection, Immunity and inflammation, University of Glasgow, UK

\*Corresponding author: +2721 8083327, [pchellan@sun.ac.za](mailto:pchellan@sun.ac.za)

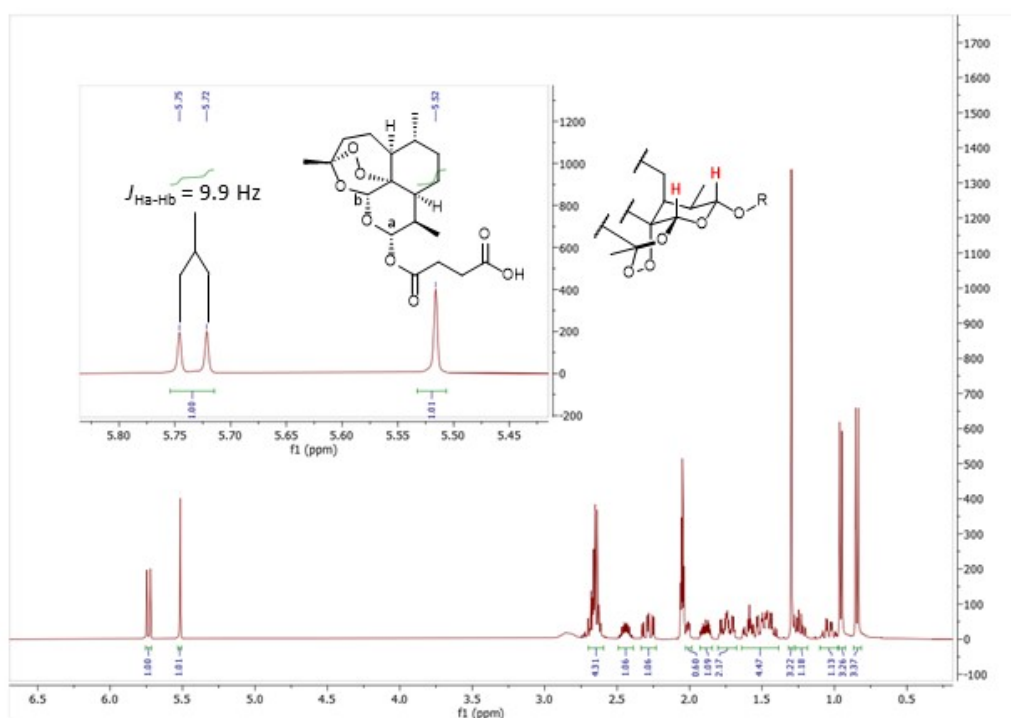

**Figure S1** Structure of a-artesunate and <sup>1</sup>H NMR spectrum showing coupling constant for proton “a”. Inset: Magnification of region showing the resonances for H<sub>a</sub> and H<sub>b</sub>.

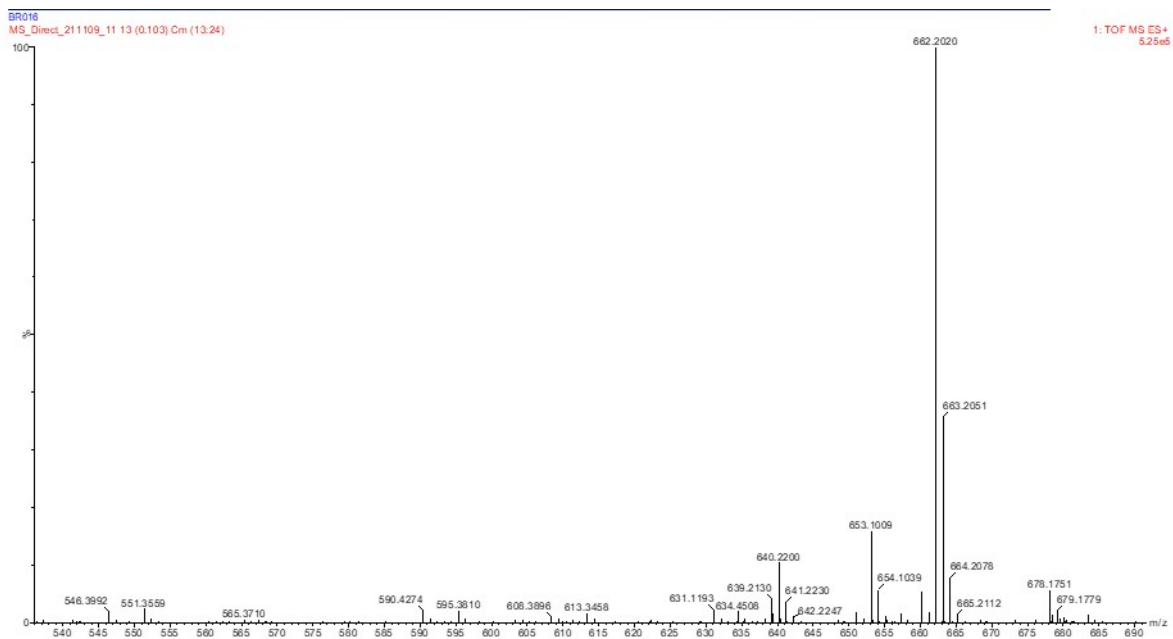

Figure S2 ESI-MS chromatogram of C1 in positive mode

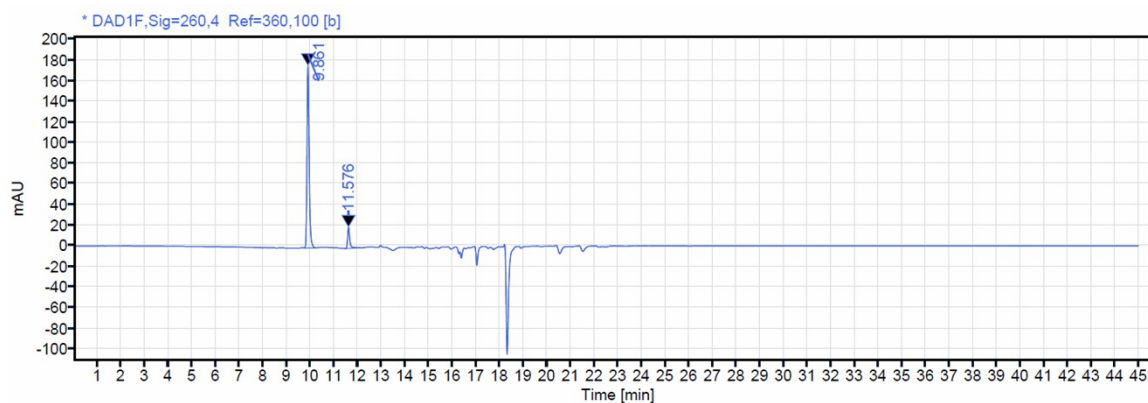

Figure S3 HPLC trace of C1

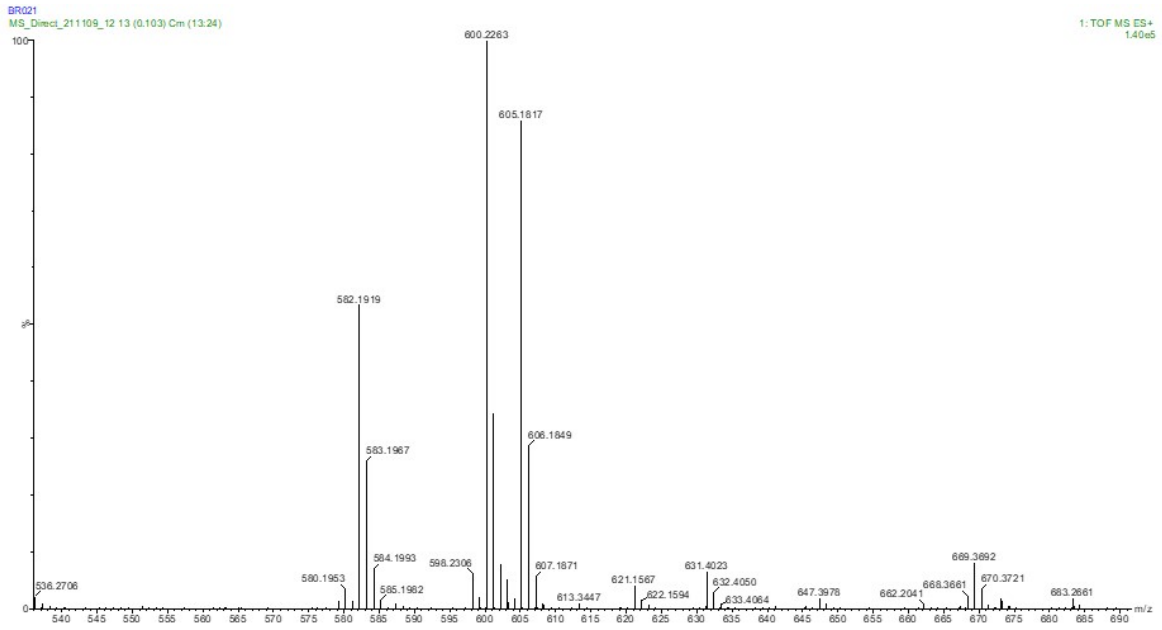

**Figure S4** ESI-MS chromatogram of **C2** in positive mode

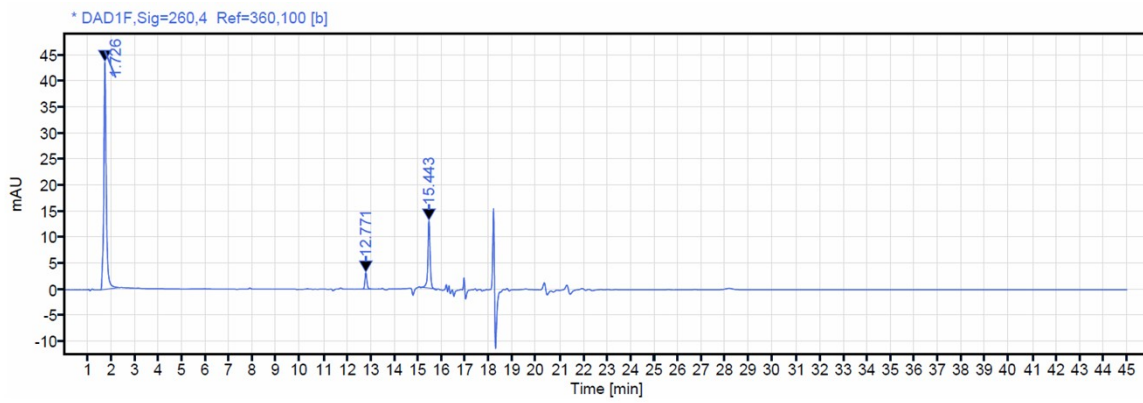

**Figure S5** HPLC trace of **C2**

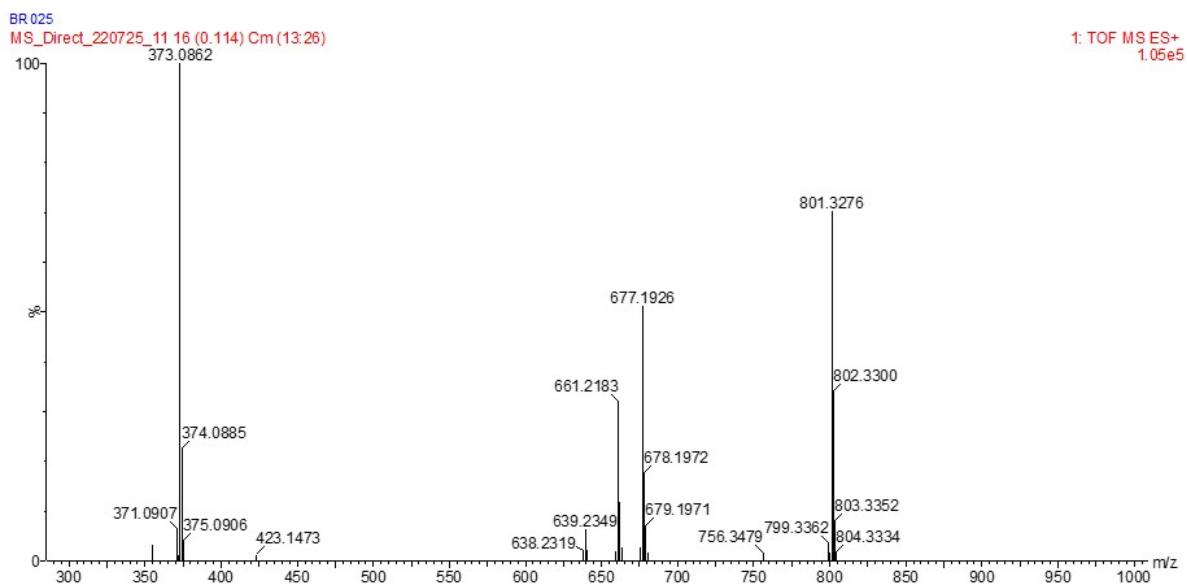

**Figure S6** ESI-MS chromatogram of **C3** in positive mode

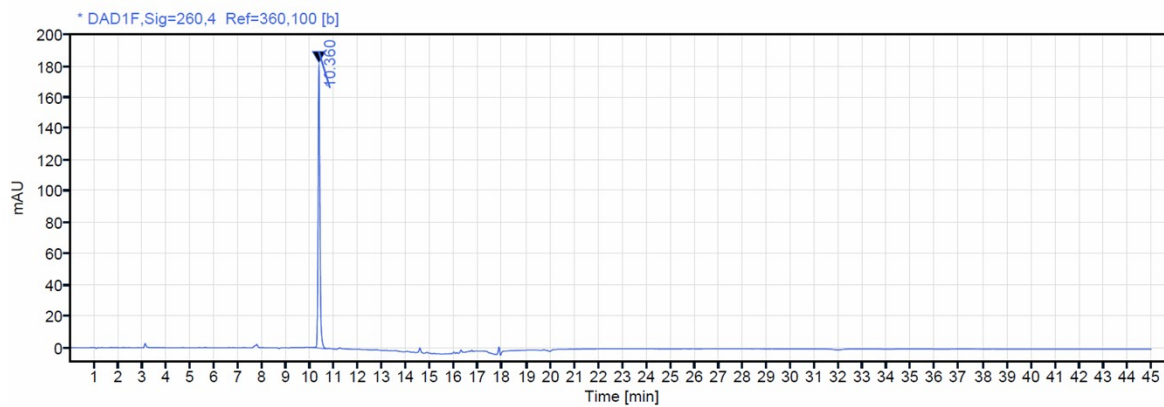

**Figure S7** HPLC trace of **C3**

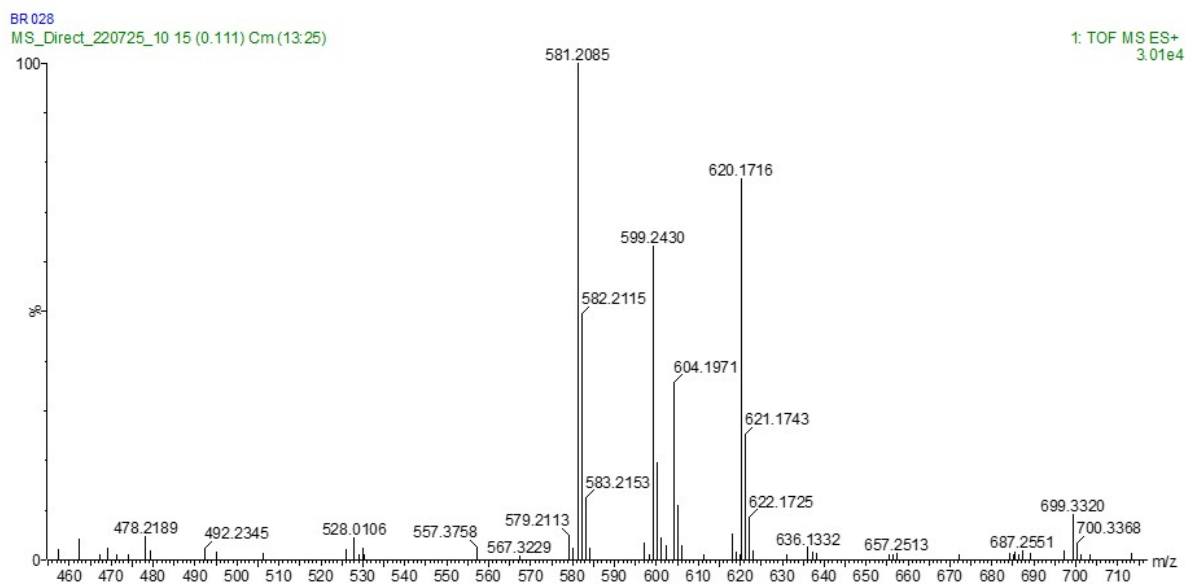

Figure S8 ESI-MS chromatogram of C4 in positive mode

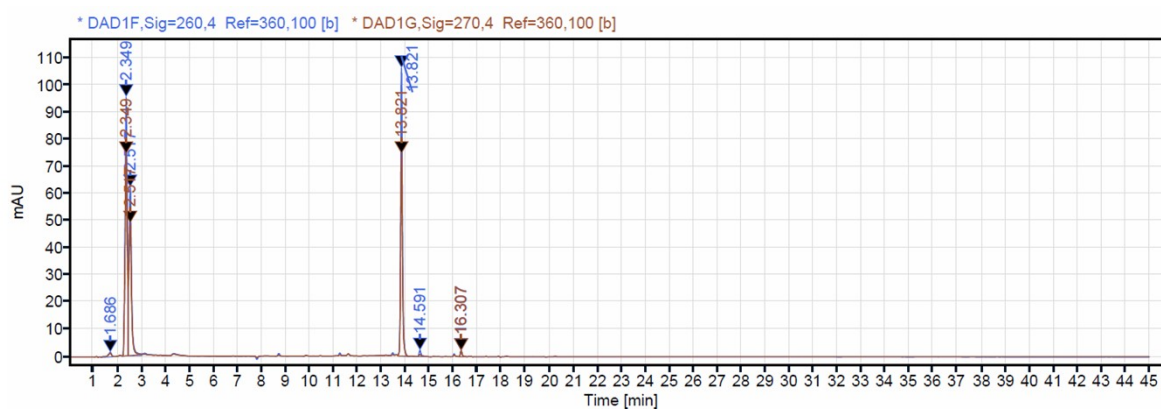

Figure S9 HPLC trace of C4

Cell viability data of complexes C1-C4 tested against the PNT1A and HEK293 cell lines.

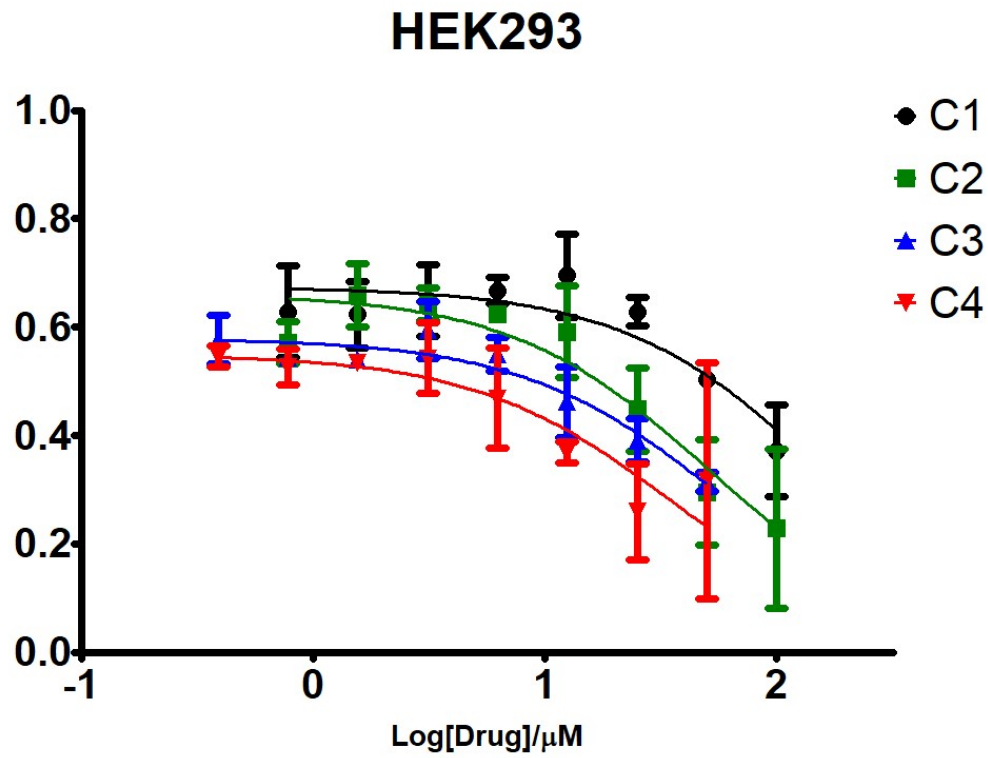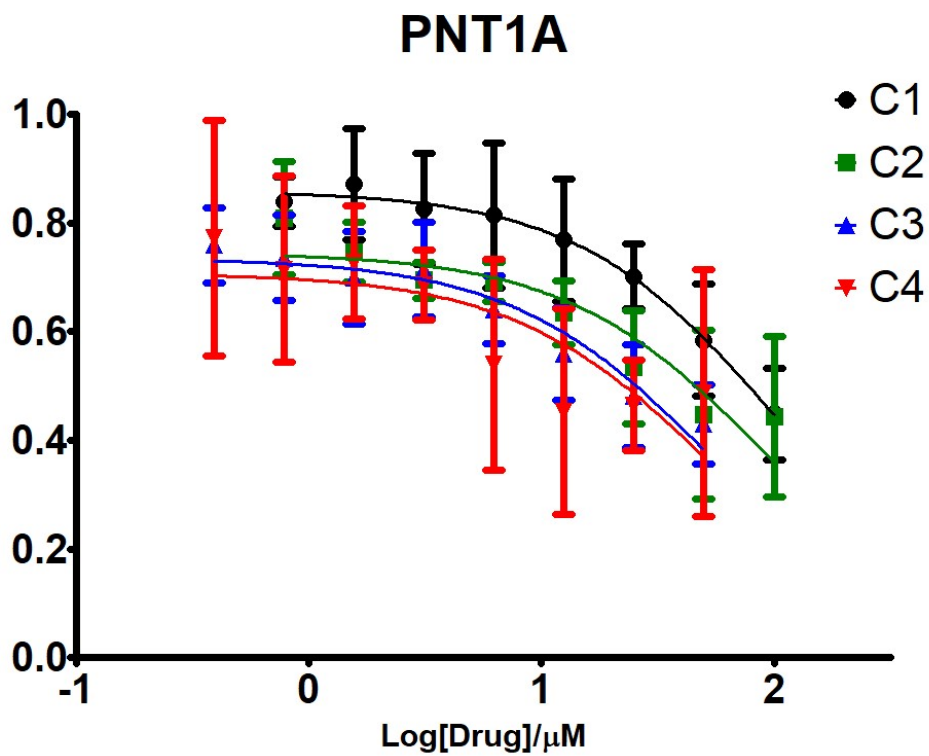

Supplement: d3dt02254d1.pdf [file d3dt02254d1.pdf]
